# Supplementary material
Source: MDPI journal article supplement (https://www.mdpi.com/2306-5710/2/1/7)
Supplement: s1 [file s1]

# Supplementary Materials: Exploring Retro-Nasal Aroma's Influence on Mouthfeel Perception of Chardonnay Wines

Anthony Sereni, James Osborne and Elizabeth Tomasino

**Table S1.** Summary treatments used to create Chardonnay wines with different mouthfeel qualities.

| Treatment | Inoculation timing          | Fermentation temp (°C) | Yeast strain <sup>1</sup> | Bacteria Strain             |
|-----------|-----------------------------|------------------------|---------------------------|-----------------------------|
| 1         | Sequential                  | 15                     | Strain 1                  | <i>Oenococcus oeni</i> Beta |
| 2         | Sequential                  | 21                     | Strain 1                  | <i>Oenococcus oeni</i> Beta |
| 3         | Sequential <sup>2</sup>     | 15                     | Strain 2 + Strain 1       | <i>Oenococcus oeni</i> Beta |
| 4         | Sequential <sup>2</sup>     | 21                     | Strain 2 + Strain 1       | <i>Oenococcus oeni</i> Beta |
| 5         | Co-innoculated              | 15                     | Strain 1                  | <i>Oenococcus oeni</i> Beta |
| 6         | Co-innoculated              | 21                     | Strain 1                  | <i>Oenococcus oeni</i> Beta |
| 7         | Co-innoculated <sup>2</sup> | 15                     | Strain 2 + Strain 1       | <i>Oenococcus oeni</i> Beta |
| 8         | Co-innoculated <sup>2</sup> | 21                     | Strain 2 + Strain 1       | <i>Oenococcus oeni</i> Beta |

Sequential refers to malolactic fermentation occurring after primary alcoholic fermentation. Co-innoculation refers to malolactic fermentation and alcoholic fermentation occurring at the same time. <sup>1</sup> Strain 1—*Saccharomyces cerevisiae* strain D47, strain 2—Prelude™ (*Torulaspora delbrueckii*); <sup>2</sup> Prelude was inoculated 48 h prior to the start of alcoholic fermentation.

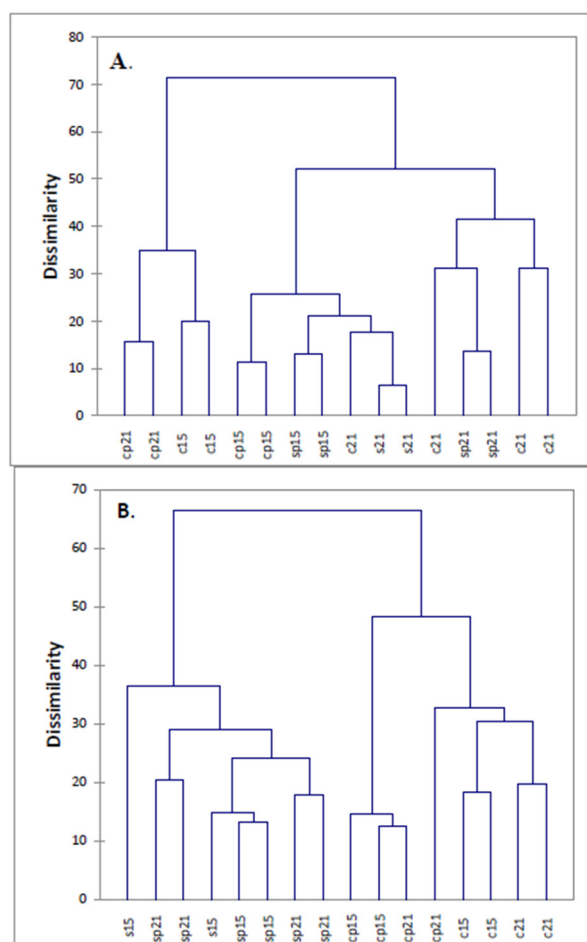

**Figure S1.** Dissimilarity dendrograms from hierarchical agglomerative clustering analysis based on mouthfeel characteristics that show wine replicates; A (+R), B (-R).
